# Supplementary material for: Risk factors of first thrombosis in obstetric antiphospholipid syndrome
Source: PubMed Central journal article supplement — Lupus Sci Med. 2024 Jan 4;11(1):e001044. doi: 10.1136/lupus-2023-001044 (PMC10773425; doi:10.1136/lupus-2023-001044), 2024-01-04
Supplement: lupus-2023-001044supp001.pdf [file lupus-2023-001044supp001.pdf]

**Supplementary Table S1** Summary of studies on follow ups of thrombotic events in isolated OAPS.

| Year | Author                              | Sample size (cases) | Incidence of thrombotic events                                                     | Follow-up        | Thrombotic events                                                         | Risk factors for thrombosis in OAPS patients |
|------|-------------------------------------|---------------------|------------------------------------------------------------------------------------|------------------|---------------------------------------------------------------------------|----------------------------------------------|
| 2001 | Erkan et al. <sup>6</sup>           | 65                  | 32.3% (21/65)                                                                      | 8.1 years        | Venous (n=7)<br>Stroke (n=5)<br>TIA (n=7)<br>Arterial (n=1)<br>CAPS (n=1) | -                                            |
| 2011 | Lefèvre et al. <sup>2</sup>         | 32                  | 3.3/100 patient-years                                                              | 50 months        | TIA, DVT and PE (n=1)<br>DVT and PE (n=2)<br>PE (n=1)                     | -                                            |
| 2012 | Gris et al. <sup>7</sup>            | 517                 | Annual rates were 0.66% for PE, 1.82% for DVT, 0.68% for SVT, and 0.34% for stroke | Nearly 9.5 years | PE (n=20)<br>DVT (n=68)<br>SVT (n=21)<br>TIA or stroke (n=15)             | LA                                           |
| 2012 | Martinez-Zamora et al. <sup>8</sup> | 57                  | 2.56/100 patient-years<br>12-year cumulative incidence rate: 19.3%                 | 7.3 years        | Stroke (n=6)<br>DVT (n=2)<br>PE (n=2)                                     | Presence of aPLs                             |
| 2015 | Alijotas-Reig et al. <sup>9</sup>   | 247                 | 9.8% (16/164)                                                                      | 3 years          | Venous (n=13)<br>Arterial (n=3)                                           | -                                            |

|      |                                    |      |                        |            |                                                                          |                                                                                                                           |
|------|------------------------------------|------|------------------------|------------|--------------------------------------------------------------------------|---------------------------------------------------------------------------------------------------------------------------|
| 2017 | Drozidnsky et al. <sup>10</sup>    | 115  | 10.4% (12/115)         | 10.9 years | TIA (n=6)<br>Stroke (n=3)<br>PE (n=1)<br>Ovarian vein (n=1)<br>DVT (n=1) | -                                                                                                                         |
| 2018 | Rottenstreich et al. <sup>11</sup> | 62   | 30.6% (19/62)          | 61 months  | DVT (n=6)<br>DVT with PE (n=6)<br>Stroke (n=5)<br>TIA (n=2)<br>PE (n=1)  | -                                                                                                                         |
| 2019 | de Jesús et al. <sup>4</sup>       | 99   | 4.9/100 patient years  | 7.6 years  | Venous (n=25)<br>Arterial (n=17)<br>Both (n=5)                           | Younger age, additional cardiovascular risk factors, SVT, heart valve disease, multiple aPL positivity, and higher aGAPSS |
| 2019 | Udry et al. <sup>12</sup>          | 79   | 7.6% (6/79)            | 5 years    | DVT (n=6)                                                                | -                                                                                                                         |
| 2019 | Alijotas-Reig et al. <sup>13</sup> | 1000 | 3.1% (31/1000)         | 7 years    | Venous (n=25)<br>Arterial (n=36)                                         | -                                                                                                                         |
| 2021 | Tonello et al. <sup>14</sup>       | 94   | 0.49/100 patient years | 8.7 years  | Venous (n=1)<br>Arterial (n=3)                                           | Presence of LA                                                                                                            |
| 2021 | Jiang et al. <sup>15</sup>         | 44   | 2.27% (1/44)           | 61 months  | Venous (n=1)                                                             | -                                                                                                                         |
| 2022 | Niznik et al. <sup>16</sup>        | 67   | 35.8% (24/67)          | >10 years  | Venous (n=13)<br>Arterial (n=6)<br>Both (n=6)                            | Heart valve disease and ANA positivity                                                                                    |

OAPS, obstetric antiphospholipid syndrome; TIA, transient ischemic attack; CAPS, catastrophic antiphospholipid syndrome; PE, pulmonary embolism; DVT, deep vein thrombosis; SVT, superficial vein thrombosis; LA, lupus anticoagulant; aPLs, antiphospholipid antibodies; aGAPSS, adjusted global antiphospholipid syndrome score; ANA, antinuclear antibody.
